# Supplementary material for: Photophysics of Ir(iii) complexes with oligo(arylene ethynylene) ligandsElectronic supplementary information (ESI) available: synthesis and characterization of 1 and 2; electrochemical data and absorption spectra of 1 and 2; transient absorption spectrum of 3. See http://www.rsc.org/suppdata/cc/b2/b206987c/
Source: Royal Society of Chemistry journal article supplement (doi:10.1039/b206987c), 2002-09-26
Supplement: b206987c.doc [file b206987c.doc]

# Supporting Information

Photophysics of Ir(III) Complexes with Oligo(arylene ethynylene) Ligands

Ksenija D. Glusac, Shujun Jiang and Kirk S. Schanze

**Materials and General Methods.**  The solvents used in the procedures were reagent grade and used without further purification. NMR spectra were acquired on a Gemini 300 MHz NMR spectrometer. OAE ligands **1a** and **2a** were prepared according to previously published methods.2 Dimer [(ppy)2IrCl]2 and the parent complex Ir(ppy)2(bpy)+ (**3**) were prepared as described in the literature.1

**Compound 1.** Dimer complex [(ppy)2IrCl]2 (30 mg, 0.028 mmol) and ligand **1a**2 (27 mg, 0.056 mmol) were suspended in 2.8 mL of ethoxyethanol. The reaction mixture was refluxed for 18 hours. Then most of the solvent was removed by vacuum evaporation, and the resulting concentrate was poured into an aqueous solution of NH4PF6. An orange precipitate was collected by filtration and it was then washed with ether and hexanes. The product was obtained in 72% yield (45 mg).

Spectral Data: 1H NMR (acetone-d6) δ 3.76 (s, 6H), 3.80 (s, 6H), 6.38 (d, J = 7.5 Hz, 2H), 6.93 (s, 2H), 6.98 (t, J = 7.8 Hz, 2H), 7.02 (s, 4H), 7.09 (t, J = 7.2 Hz, 2H), 7.20 (t, J = 6.6 Hz, 2H), 7.94 (d, J = 8.1 Hz, 2H), 7.99 (t, J = 9.9 Hz, 2H), 8.03 (d, J = 6.0 Hz, 2H), 8.12 (s, 2H), 8.27 (d, J = 8.1 Hz, 2H), 8.31 (t, J = 7.2 Hz, 2H), 8.87 (d, J = 8.4 Hz, 2H). 13C NMR (acetone-d6) δ 56.2, 56.7, 88.8, 111.6, 113.5, 118.4, 118.6, 121.0, 123.7, 124.7, 125.9, 131.4, 132.6, 139.8, 141.8, 145.0, 150.7, 153.3, 154.2, 155.0, 156.0, 168.4. HRMS (FAB, NBA matrix, positive ion) Calcd for C52H40O4N4Ir: 977.268; found: 977.269.

**Compound 2.** Dimer complex [(ppy)2IrCl]2 (30 mg, 0.028 mmol) and ligand **2a**2 (65 mg, 0.056 mmol) were suspended in 2.8 mL of ethoxyethanol. The reaction mixture was refluxed for 20 hours. Then most of the solvent was removed by vacuum evaporation, and the resulting concentrate was poured into an aqueous solution of NH4PF6. A yellow precipitate was collected by filtration and washed with ether and hexanes. The crude product was further purified by column chromatography on silica gel using methylene chloride as an eluent. The product was obtained in 22% yield (36 mg).

Spectral Data: 1H NMR (CDCl3) δ 0.86 (s, 12H), 1.29 (s, 16 H), 1.37 (m, 8H), 1.57 (m, 8H), 1.74 (m, 4H), 1.85 (m, 4H), 3.99 (m, 8H), 6.26 (d, J = 7.2 Hz, 2H), 6.91 (t, J = 6.9 Hz, 2H), 6.94 (s, 2H), 6.99 (s, 2H), 7.04 (m, 4H), 7.35 (t, J = 6.9 Hz, 2H), 7.44 (t, J = 7.5 Hz, 4H), 7.58 (s, 12H), 7.68 (d, J = 7.8 Hz, 2H), 7.79 (t, J = 7.5 Hz, 2H), 7.95 (m, 4H), 8.19 (d, J = 7.8 Hz, 2H), 8.72 (d, J = 8.4 Hz, 2H). 13C NMR (CDCl3) δ 14.1, 22.6, 25.8, 26.0, 28.9, 29.1, 29.3, 31.9, 69.5, 69.6, 86.3, 89.2, 94.8, 95.9, 111.3, 116.0, 116.6, 117.0, 120.0, 122.0, 122.7, 123.4, 124.9, 125.1, 125.4, 127.0, 127.7, 128.8, 130.6, 131.6, 132.0, 138.2, 140.2, 141.2, 141.7, 143.3, 148.6, 149.4, 151.8, 153.5, 153.8, 167.7. HRMS (electrospray, FT-MS) Calcd for C104H104O4N4Ir: 1665.794. Found: 1665.756.

**Supporting Information References**

1. S. Lamansky, P. Djurovich, D. Murphy, F. Abdel-Razzaq, R. C. Kwong, I. Tsyba, M. Bortz, B. Mui, R. Bau and M. E. Thompson. *Inorg. Chem.* 2001, **40**, 1704.

2. K. D. Ley, Y. T. Li, J. V. Johnson, D. H. Powell and K. S. Schanze. *Chem. Commun.* 1999, 1749.

3. A. A. Vlcek, E. S. Dodsworth, W. J. Pietro and A. B. P. Lever. *Inorg. Chem.* 1995, **34**, 1906.

**Table S-1. Electrochemical Potentials and Estimated 3MLCT State Energies for 1 – 3** a

| **Complex** | **E1/2 (IrIII/IV) / V** b | **E1/2 (L/L-) / V** c | **E1/2 / V** d | **EMLCT / eV** |
| --- | --- | --- | --- | --- |
| **3** | 1.29 | -1.42 (bpy/bpy-) | 2.71 | 2.25  0.1 e |
| 1 | 1.39 | -1.04 (**1a**/**1a**-) | 2.43 | 2.0  0.1 f |
| 2 | g | -0.92 (**2a**/**2a**-) | -- | 1.9  0.1 h |

a Electrochemical potentials in CH3CN solution, relative to SCE electrode. b Reversible oxidation wave. c Reversible reduction wave. d Computed by E1/2 = E1/2(IrIII/IV) – E1/2(L/L-). e Energy (Eoo) estimated by emission spectral fit of room temperature emission spectrum. Note that Eoo is a higher energy than would be estimated from emission maximum. f Estimated from electrochemical potentials by the equation, EMLCT = E1/2 - , where  is estimated from the data for parent complex **3** by the equation,  = E1/2 – EMLCT. Ref. 3 provides a detailed justification for this approach to computing MLCT state energies. g Irreversible wave. h EMLCT for **2** is estimated to be approximately 0.1 eV lower than EMLCT for **1** based on the 0.12 V difference in the OAE ligand-based reduction potentials (E1/2 (L/L-).


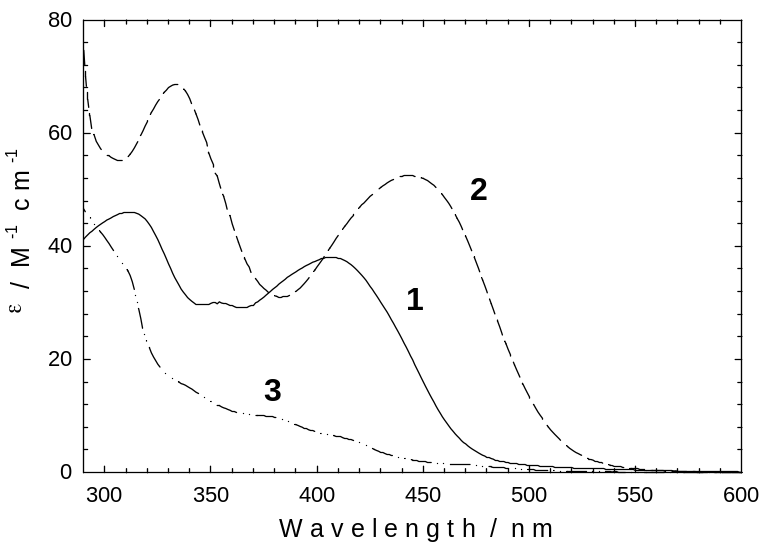


**Figure S-1**. UV-visible absorption spectra of **1** – **3** in THF solution.


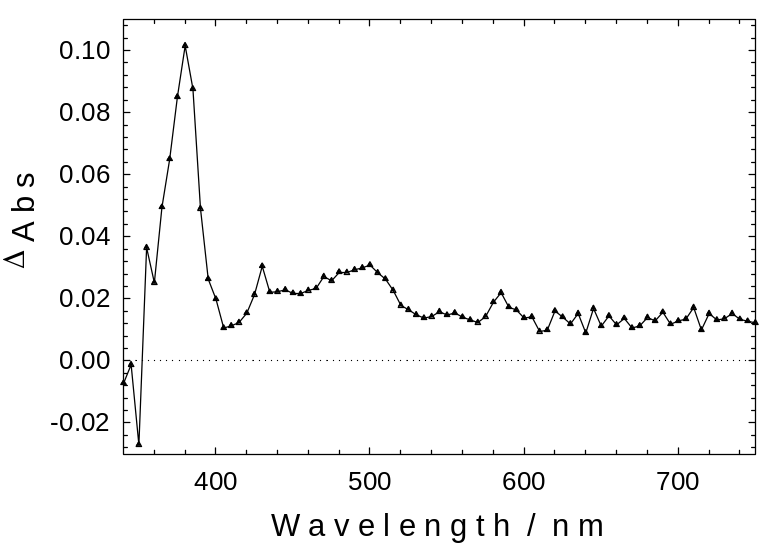


**Figure S-2**. Transient absorption spectrum of **3** in THF solution 40 ns following 355 nm excitation pulse (5 mj, 10 ns fwhm).
